# Supplementary material
Source: PubMed Central journal article supplement (PMC9071487)
Supplement: glab258_suppl_supplementary_materials.pdf [file glab258_suppl_supplementary_materials.pdf]

Supplemental eTable 1 – List of highly anticholinergic drugs according to the 2019 Beers criteria that were used by Health ABC participants.

| <b>Medication Class</b> | <b>Generic Name</b> |
|-------------------------|---------------------|
| Antiarrhythmic          | Disopyramide        |
| Antidepressant          | Amitriptyline       |
|                         | Amoxapine           |
|                         | Clomipramine        |
|                         | Desipramine         |
|                         | Doxepin             |
|                         | Imipramine          |
|                         | Nortriptyline       |
|                         | Paroxetine          |
|                         | Protriptyline       |
|                         | Trimipramine        |
| Antiemetic              | Prochlorperazine    |
|                         | Promethazine        |
| Antihistamine, 1st gen. | Brompheniramine     |
|                         | Chlorpheniramine    |
|                         | Clemastine          |
|                         | Cyproheptadine      |
|                         | Dexbrompheniramine  |
|                         | Dexchlorpheniramine |
|                         | Diphenhydramine     |
|                         | Doxylamine          |
|                         | Hydroxyzine         |
|                         | Meclizine           |
|                         | Clindinium          |
|                         | Dicyclomine         |
|                         | Homatropine         |
|                         | Hyoscyamine         |
|                         | Hyoscyamine         |
|                         | Methscopolamine     |
|                         | Propantheline       |
|                         | Pyrilamine          |
|                         | Triprolidine        |
| Antimuscarinics         | Darifenacin         |
|                         | Fesoterodine        |
|                         | Flavoxate           |
|                         | Oxybutynin          |
|                         | Solifenacin         |
|                         | Tolterodine         |

|                  |                 |
|------------------|-----------------|
|                  | Trospium        |
| Antiparkinsonian | Benzotropine    |
|                  | Trihexyphenidyl |
| Antipsychotic    | Chlorpromazine  |
|                  | Clozapine       |
|                  | Loxapine        |
|                  | Olanzapine      |
|                  | Perphenazine    |
|                  | Thioridazine    |
|                  | Triflupromazine |
| Antispasmodic    | Atropine        |
|                  | Belladonna      |
|                  | Scopolamine     |
| Muscle relaxants | Cyclobenzaprine |
|                  | Orphenadrine    |

Supplemental eTable 2. Generalized estimating equation (GEE) results for the association of recurrent falls by anticholinergic medication use in a sample of adults >70, without and with stratification on COMT genotype.

|                       | Demographic adjusted <sup>1</sup> | Adjusted + Smoking   | Adjusted + Diabetes  | Adjusted + Anxiety   | Adjusted + Back pain | Adjusted + Sleep troubles | Adjusted + Urinary incontinence | Adjusted + CES-D     | Adjusted + Baseline falls |
|-----------------------|-----------------------------------|----------------------|----------------------|----------------------|----------------------|---------------------------|---------------------------------|----------------------|---------------------------|
|                       | OR (95% CI)                       | OR (95% CI)          | OR (95% CI)          | OR (95% CI)          | OR (95% CI)          | OR (95% CI)               | OR (95% CI)                     | OR (95% CI)          | OR (95% CI)               |
| Unstratified (n=2372) | 2.11<br>(1.73, 2.59)              | 2.01<br>(1.59, 2.53) | 1.97<br>(1.57, 2.48) | 2.00<br>(1.58, 2.52) | 1.95<br>(1.55, 2.47) | 1.95<br>(1.55, 2.46)      | 1.92<br>(1.52, 2.42)            | 1.88<br>(1.38, 2.55) | 2.18<br>(1.75, 2.72)      |
| Stratified by COMT:   |                                   |                      |                      |                      |                      |                           |                                 |                      |                           |
| Met/Met (n=454)       | 1.49<br>(0.89, 2.50)              | 1.37<br>(0.75, 2.50) | 1.30<br>(0.72, 2.37) | 1.44<br>(0.79, 2.64) | 1.43<br>(0.78, 2.61) | 1.30<br>(0.71, 2.37)      | 1.24<br>(0.68, 2.27)            | 1.20<br>(0.50, 2.91) | 1.75<br>(1.02, 3.01)      |
| Val carrier (n=1918)  | 2.25<br>(1.80, 2.80)              | 2.16<br>(1.68, 2.78) | 2.12<br>(1.66, 2.72) | 2.10<br>(1.63, 2.71) | 2.06<br>(1.59, 2.66) | 2.11<br>(1.64, 2.72)      | 2.07<br>(1.61, 2.67)            | 2.01<br>(1.45, 2.79) | 2.26<br>(1.78, 2.89)      |

<sup>1</sup>Age, Gender, Education

COMT= Catechol-O-methyltransferase; CES-D= Center for Epidemiologic Studies Depression Scale; OR=odds ratio; CI=confidence interval
